# Supplementary material for: Prognostic Assessment in High-Grade Soft-Tissue Sarcoma Patients: A Comparison of Semantic Image Analysis and Radiomics
Source: MDPI journal article supplement (doi:10.3390/cancers13081929), 2021-04-16
Supplement: s1 [file s1]

# Supplemental Material

|                                                                                                                                                        |    |
|--------------------------------------------------------------------------------------------------------------------------------------------------------|----|
| Supplemental Figures .....                                                                                                                             | 2  |
| Figure S1 Patients Workflow .....                                                                                                                      | 2  |
| Figure S2 Time dependent area under the receiver operator characteristic (ROC) curves AUCs of the developed models in the testing patient cohort ..... | 3  |
| Figure S3 Calibration curves of the developed models in the testing patient cohort .....                                                               | 4  |
| Figure S4 Calibration curves of the developed combined models in the testing patient cohort .....                                                      | 5  |
| Supplemental Tables .....                                                                                                                              | 6  |
| Table S1 Histologies of Soft-Tissue Sarcomas .....                                                                                                     | 6  |
| Table S2 MRI acquisition parameters .....                                                                                                              | 7  |
| Table S3 Extracted radiomics features .....                                                                                                            | 8  |
| Table S4 R packages .....                                                                                                                              | 11 |
| Table S5 Inter-reader agreement of semantic imaging features .....                                                                                     | 12 |
| Table S6 Prognostic performance of developed models depicted as concordance index with 95% confidence interval (in parenthesis) .....                  | 13 |
| Table S7 Final input variables and model coefficients of the final elastic net regression models .....                                                 | 14 |
| Table S9 Performance of radiomic and semantic models in randomly chosen non-independent cohorts .....                                                  | 17 |
| Table S10 TRIPOD Checklist: Prediction Model Development and Validation .....                                                                          | 18 |

# Supplemental Figures

Figure S1 Patients Workflow

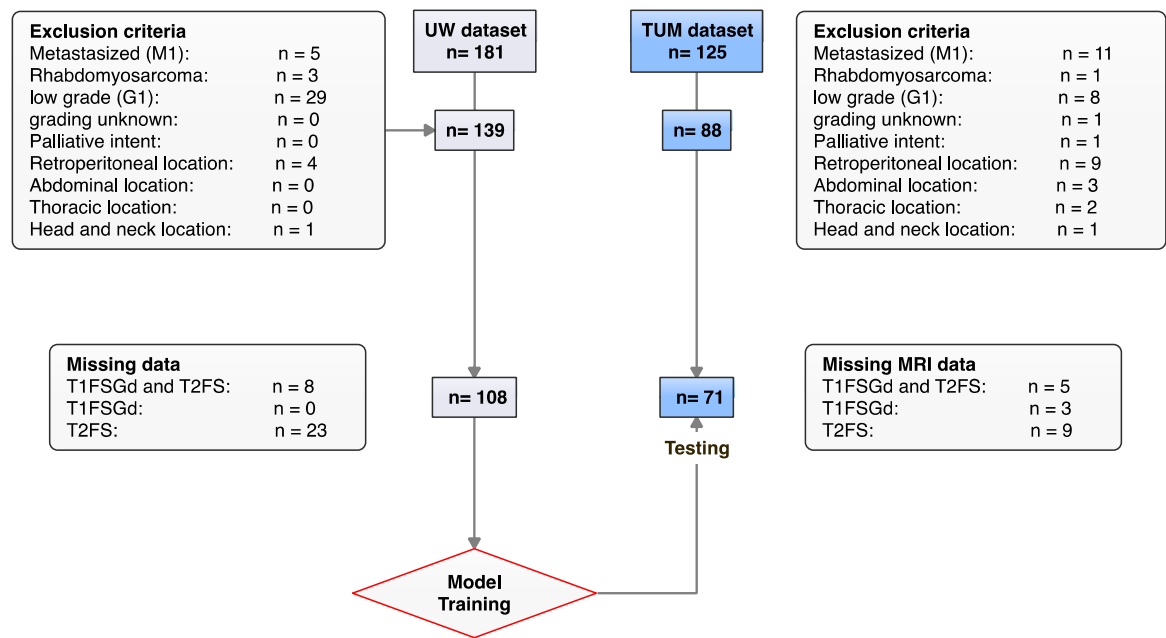

**Figure S2 Time dependent area under the receiver operator characteristic (ROC) curves AUCs of the developed models in the testing patient cohort**

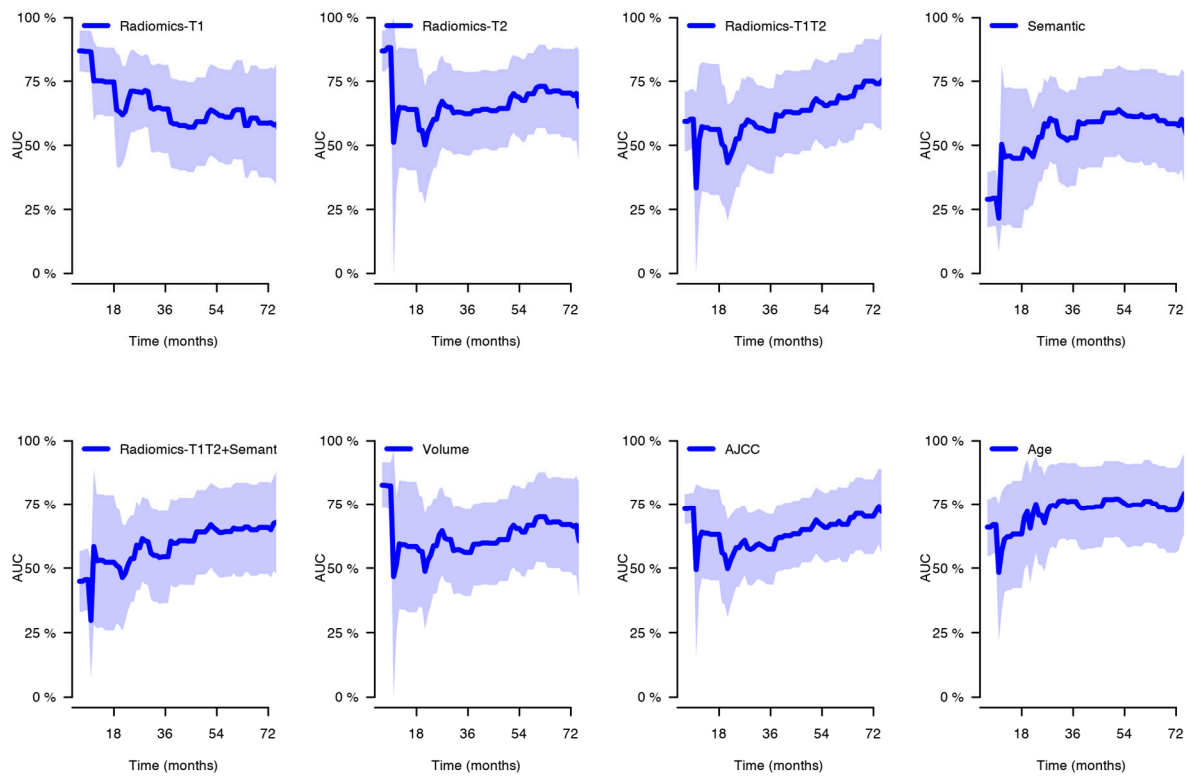

The shaded blue area represents the 95% confidence interval.

**Figure S3 Calibration curves of the developed models in the testing patient cohort**

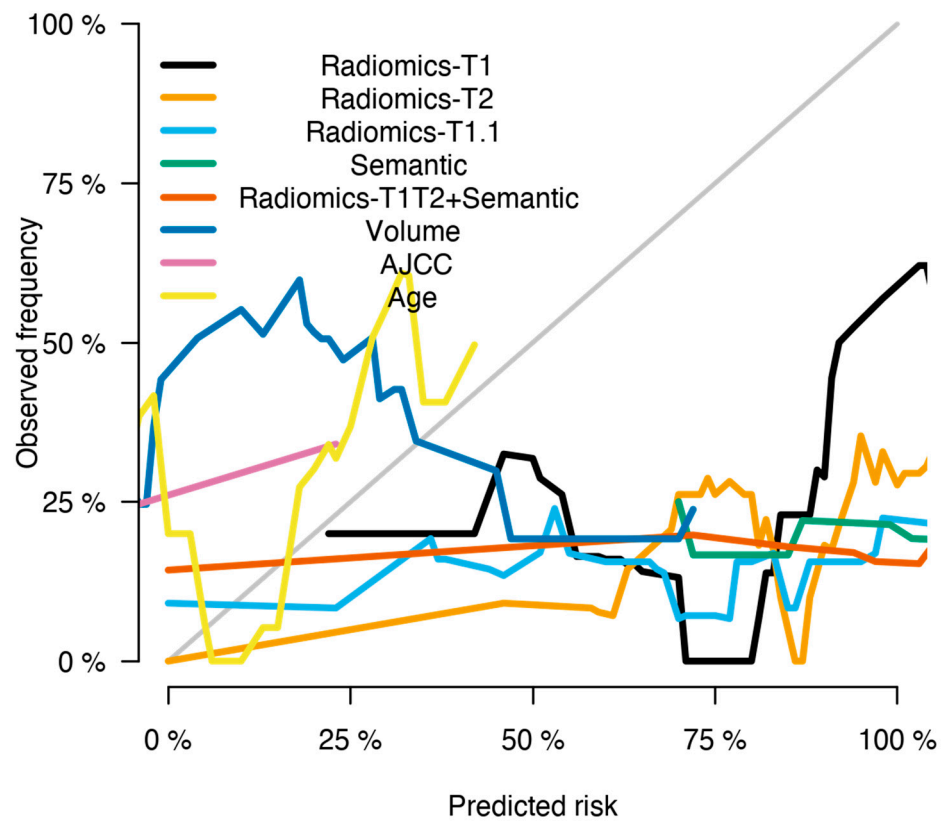

**Figure S4 Calibration curves of the developed combined models in the testing patient cohort**

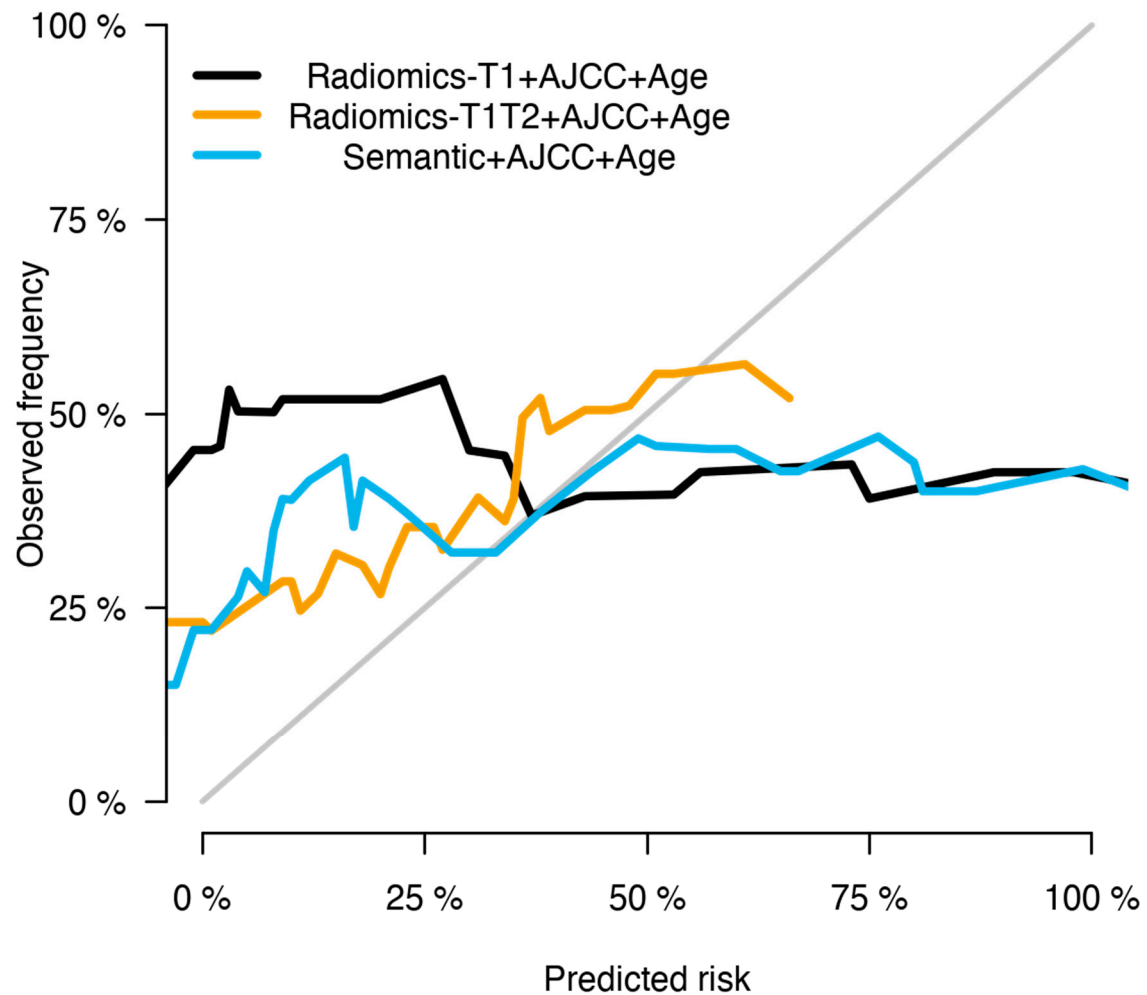

The calibration curve of Radiomics-T2+AJCC+Age is displayed in Figure 4.

## Supplemental Tables

**Table S1 Histologies of Soft-Tissue Sarcomas**

The distribution of histologies was significantly different (p-value <0.001. Fisher's exact test). Sorted by patient number in the TUM cohort.

| Histological subtype (%)                | TUM (Test cohort) | UW (Training cohort) |
|-----------------------------------------|-------------------|----------------------|
| Pleomorphic sarcoma                     | 23 p (32 %)       | 50 p (45%)           |
| Myxofibrosarcoma                        | 13 p (18 %)       | 2 p (2 %)            |
| Synovial sarcoma                        | 9 p (13 %)        | 7 p (6 %)            |
| Dedifferentiated liposarcoma            | 8 p (11 %)        | 3 p (3 %)            |
| Myxoid liposarcoma                      | 7 p (10 %)        | 7 p (6 %)            |
| Leiomyosarcoma                          | 3 p (4 %)         | 12 p (11 %)          |
| Liposarcoma <sup>1</sup>                | 3 p (4 %)         | 2 p (2 %)            |
| Spindle cell sarcoma                    | 2 p (3 %)         | 10 p (10 %)          |
| Pleomorphic liposarcoma                 | 2 p (3 %)         | 3 p (3 %)            |
| Alveolar soft part sarcoma              | 1 p (1 %)         | 0 p (0 %)            |
| Malignant peripheral nerve sheath tumor | 0 p (0 %)         | 6 p (5 %)            |
| Extrasekeletal myxoid Chondrosarcoma    | 0 p (0 %)         | 2 p (2 %)            |
| Myofibrosarcoma                         | 0 p (0 %)         | 1 p (1 %)            |
| Angiosarcoma                            | 0 p (0 %)         | 1 p (1 %)            |
| Small round cell sarcoma                | 0 p (0 %)         | 1 p (1 %)            |
| No classification                       | 0 p (0 %)         | 1 p (1 %)            |

<sup>1</sup> not further specified.

**Table S2 MRI acquisition parameters**

Median values are depicted. The range is noted in brackets.

|                                 | Sequence      | TUM <sup>a</sup><br>(Test cohort)                             | UW <sup>b</sup><br>(Training cohort)                             |
|---------------------------------|---------------|---------------------------------------------------------------|------------------------------------------------------------------|
| <b>Magnetic field strength</b>  |               | 1.5 T (1.5 - 3.0)                                             | 1.5 (1.0 - 3.0)                                                  |
| <b>In-Plane resolution (mm)</b> | <b>T1FSGd</b> | 0.73 x 0.73<br>(0.64x0.64 -0.81x0.81)                         | 0.56 x 0.56<br>(0.20 x 0.20 - 1.56 x 1.56)                       |
| <b>Slice thickness (mm)</b>     |               | 5<br>(4 - 5)                                                  | 6.5<br>(1.0 - 11.0)                                              |
| <b>Matrix</b>                   |               | 320 x 320<br>(176 x 176 - 1152 x 1152)                        | 512 x 512<br>(256 x 190 – 1200 x 1200)                           |
| <b>TR (ms)</b>                  |               | 685 (500 - 1311)                                              | 645 (150 – 1533)                                                 |
| <b>TE (ms)</b>                  |               | 12 (4 - 20)                                                   | 14 (9 - 29)                                                      |
| <b>Plane Orientation</b>        |               | axial: 70 p (99%)<br>sagittal: 1 p (1%)<br>coronal: 0 p (0%)  | axial: 106 p (98 %)<br>sagittal: 1 p (1 %)<br>coronal: 1 p (1 %) |
| <b>In-Plane resolution (mm)</b> | <b>T2FS</b>   | 0.73 x 0.73<br>(0.64x0.64 -0.81x0.81)                         | 0.625 x 0.625<br>(0.17 x 0.17 - 1.72 x 1.72)                     |
| <b>Slice thickness (mm)</b>     |               | 5 (4 - 5)                                                     | 6.5 (3.3 - 11.6)                                                 |
| <b>Matrix</b>                   |               | 448 x 448<br>(222 x 222 - 1200 x 1200)                        | 432 x 432<br>(160 x 224 - 880 x 880)                             |
| <b>TR (ms)</b>                  |               | 7330 (2021 - 18516)                                           | 3925 (370 -13000)                                                |
| <b>TE (ms)</b>                  |               | 60 (18 - 133)                                                 | 64.5 (12-738)                                                    |
| <b>Plane Orientation</b>        |               | axial: 7 p (10%)<br>sagittal: 5 p (7%)<br>coronal: 59 p (83%) | axial: 103 p (95 %)<br>sagittal: 3 p (3 %)<br>coronal: 2 p (2 %) |

Abbreviation: p: patients, T1FSGd: contrast-enhanced T1-weighted fat saturated, T2FS: T2-weighted fat saturated, TE: echo time, TR: repetition time,

<sup>a</sup>MRI Scanner: GE (Chicago, USA): Signa; Philips (Amsterdam, Netherlands):

Achieva, Ingenia; Siemens (Munich, Germany): Verio, Avanto, Symphony,

<sup>b</sup>MRI Scanner: GE (Chicago, USA): Discovery MR750, Signa, Optima 450; Hitachi (Tokyo, Japan): Oasis; Philips (Amsterdam, Netherlands): Achieva, Gyroscan NT, Ingenia, Intera; Siemens (Munich, Germany): Avanto, Area, Espree, Harmony, Symphony, TrioTim; Toshiba (Tokyo, Japan): Titan.

### Extracted radiomic features

All over 105 features per sequences were extract from the original image or the labelmap (shape features) yielding a total of 210 features per patients. The pyradiomics package (version 2.2) implemented in python was used to calculate all features. The features were calculated following the Imaging Biomarker Standardization Initiative (IBSI) [1]. Table S3 depicts all extracted features. Please see the [pyradiomics documentation](http://pyradiomics.readthedocs.io/en/latest/features.html) (<http://pyradiomics.readthedocs.io/en/latest/features.html>) for further details such as formulae.

**Table S3 Extracted radiomics features**

|      | <b>Shape Features</b>                                  |
|------|--------------------------------------------------------|
| 1.)  | Volume                                                 |
| 2.)  | Surface Area                                           |
| 3.)  | Surface Volume Area                                    |
| 4.)  | Sphericity                                             |
| 5.)  | Spherical Disproportion                                |
| 6.)  | Maximum 3D Diameter                                    |
| 7.)  | Maximum 2D Diameter Slice                              |
| 8.)  | Maximum 2D Diameter Column                             |
| 9.)  | Maximum 2D Diameter Row                                |
| 10.) | Major Axis                                             |
| 11.) | Minor Axis                                             |
| 12.) | Least Axis                                             |
| 13.) | Elongation                                             |
| 14.) | Flatness                                               |
|      | <b>First Order Features</b>                            |
| 1.)  | Energy                                                 |
| 2.)  | Intensity Histogram Entropy                            |
| 3.)  | Minimum                                                |
| 4.)  | 10th Percentile                                        |
| 5.)  | 90th Percentile                                        |
| 6.)  | Maximum                                                |
| 7.)  | Mean                                                   |
| 8.)  | Median                                                 |
| 9.)  | Interquartile Range                                    |
| 10.) | Range                                                  |
| 11.) | Mean Absolute Deviation (MAD)                          |
| 12.) | Robust Mean Absolute Deviation (rMAD)                  |
| 13.) | Root Mean Squared (RMS)                                |
| 14.) | Skewness                                               |
| 15.) | Excess Kurtosis                                        |
| 16.) | Variance                                               |
| 17.) | Intensity Histogram Uniformity                         |
|      | <b>Gray Level Co-occurrence Matrix (GLCM) Features</b> |
| 1.)  | Autocorrelation                                        |



|      |                                                      |
|------|------------------------------------------------------|
| 2.)  | Joint Average                                        |
| 3.)  | Cluster Prominence                                   |
| 4.)  | Cluster Shade                                        |
| 5.)  | Cluster Tendency                                     |
| 6.)  | Contrast                                             |
| 7.)  | Correlation                                          |
| 8.)  | Difference Average                                   |
| 9.)  | Difference Entropy                                   |
| 10.) | Difference Variance                                  |
| 11.) | Joint Energy (IBSI: Angular Second Moment)           |
| 12.) | Joint Entropy                                        |
| 13.) | Informal Measure of Correlation (IMC) 1              |
| 14.) | Informal Measure of Correlation (IMC) 2              |
| 15.) | Inverse Difference Moment (IDM)                      |
| 16.) | Inverse Difference Moment Normalized (IDMN)          |
| 17.) | Inverse Difference (ID)                              |
| 18.) | Inverse Difference Normalized (IDN)                  |
| 19.) | Inverse Variance                                     |
| 20.) | Maximum Probability (IBSI: Joint maximum)            |
| 21.) | Sum Entropy                                          |
| 22.) | Sum of Squares (IBSI: Sum of Squares)                |
| 23.) | Maximal Correlation Coefficient (MCC)                |
|      | <b>Gray Level Size Zone Matrix (GLSZM) Features</b>  |
| 1.)  | Small Area Emphasis (SAE)                            |
| 2.)  | Large Area Emphasis (LAE)                            |
| 3.)  | Gray Level Non-Uniformity (GLN)                      |
| 4.)  | Gray Level Non-Uniformity Normalized (GLNN)          |
| 5.)  | Size-Zone Non-Uniformity (SZN)                       |
| 6.)  | Size-Zone Non-Uniformity Normalized (SZNN)           |
| 7.)  | Zone Percentage (ZP)                                 |
| 8.)  | Gray Level Variance (GLV)                            |
| 9.)  | Zone Variance (ZV)                                   |
| 10.) | Zone Entropy (ZE)                                    |
| 11.) | Low Gray Level Zone Emphasis (LGLZE)                 |
| 12.) | High Gray Level Zone Emphasis (HGLZE)                |
| 13.) | Small Area Low Gray Level Emphasis (SALGLE)          |
| 14.) | Small Area High Gray Level Emphasis (SAHGLE)         |
| 15.) | Large Area Low Gray Level Emphasis (LALGLE)          |
| 16.) | Large Area High Gray Level Emphasis (LAHGLE)         |
|      | <b>Gray Level Run Length Matrix (GLRLM) Features</b> |
| 1.)  | Short Run Emphasis (SRE)                             |
| 2.)  | Long Run Emphasis (LRE)                              |
| 3.)  | Gray Level Non-Uniformity (GLN)                      |
| 4.)  | Gray Level Non-Uniformity Normalized (GLNN)          |
| 5.)  | Run Length Non-Uniformity (RLN)                      |
| 6.)  | Run Length Non-Uniformity Normalized (RLNN)          |
| 7.)  | Run Percentage (RP)                                  |

|      |                                                                  |
|------|------------------------------------------------------------------|
| 8.)  | Gray Level Variance (GLV)                                        |
| 9.)  | Run Variance (RV)                                                |
| 10.) | Run Entropy (RE)                                                 |
| 11.) | Low Gray Level Run Emphasis (LGLRE)                              |
| 12.) | High Gray Level Run Emphasis (HGLRE)                             |
| 13.) | Short Run Low Gray Level Emphasis (SRLGLE)                       |
| 14.) | Short Run High Gray Level Emphasis (SRHGLE)                      |
| 15.) | Long Run Low Gray Level Emphasis (LRLGLE)                        |
| 16.) | Long Run High Gray Level Emphasis (LRHGLE)                       |
|      | <b>Neighbouring Gray Tone Difference Matrix (NGTDM) Features</b> |
| 1.)  | Coarseness                                                       |
| 2.)  | Contrast                                                         |
| 3.)  | Busyness                                                         |
| 4.)  | Complexity                                                       |
| 5.)  | Strength                                                         |
|      | <b>Gray Level Dependence Matrix (GLDM) Features</b>              |
| 1.)  | Small Dependence Emphasis (SDE)                                  |
| 2.)  | Large Dependence Emphasis (LDE)                                  |
| 3.)  | Gray Level Non-Uniformity (GLN)                                  |
| 4.)  | Dependence Non-Uniformity (DN)                                   |
| 5.)  | Dependence Non-Uniformity Normalized (DNN)                       |
| 6.)  | Gray Level Variance (GLV)                                        |
| 7.)  | Dependence Variance (DV)                                         |
| 8.)  | Dependence Entropy (DE)                                          |
| 9.)  | Low Gray Level Emphasis (LGLE)                                   |
| 10.) | High Gray Level Emphasis (HGLE)                                  |
| 11.) | Small Dependence Low Gray Level Emphasis (SDLGLE)                |
| 12.) | Small Dependence High Gray Level Emphasis (SDHGLE)               |
| 13.) | Large Dependence Low Gray Level Emphasis (LDLGLE)                |
| 14.) | Large Dependence High Gray Level Emphasis (LDHGLE)               |

**Table S4 R packages**

| <b>Package</b> | <b>Purpose</b>                                  | <b>Version</b> |
|----------------|-------------------------------------------------|----------------|
| Irr            | inter-rater agreement                           | 0.84.1         |
| ggkm           | kaplan meier survival curves                    | 1.0            |
| ggplot2        | figures                                         | 3.1.0          |
| glmnet         | least absolute shrinkage and selection operator | 2.0-16         |
| glmnetutils    | elastic net regression                          | 1.1.2          |
| icc            | intra-class coefficient                         | 2.3.0          |
| boruta         | boruta feature reduction                        | 7.0.0          |
| dummies        | one hot encoding                                | 1.5.6          |
| mlr3           | nested cross validation                         | 0.5.0          |
| mlr3proba      | survival analysis                               | 0.1.4          |
| mlrtuning      | tuning for mlr2                                 | 0.3.0          |
| boot           | bootstrapping                                   | 1.3-20         |
| survival       | survival models                                 | 2.43-3         |
| Survminer      | cox mode plotting                               | 0.4.8          |
| riskregression | time-dependent AUC, calibration curves          | 2020.02.05     |

**Table S5 Inter-reader agreement of semantic imaging features.**

10 soft-tissue sarcoma patients were randomly selected from the testing cohort. Three blinded radiologist performed semantic feature extraction. Display of the Fleiss Kappa statistic for nominal and ordinal features and the intra-class coefficient (ICC) for continual measures.

| Feature                                   | Fleiss Kappa |
|-------------------------------------------|--------------|
| Anatomical region                         | 1.000        |
| Necrosis                                  | 1.000        |
| Boarders                                  | 0.733        |
| Homogeneity of Tumor contrast enhancement | 0.683        |
| Tumor contrast enhancement                | 0.641        |
| Dominant STIR Signalintensity             | 0.535        |
| Edema-perilesional                        | 0.524        |
| Localization                              | 0.468        |
| STIR Homogeneity                          | 0.444        |
| Image pattern                             | 0.400        |
| Tail sign                                 | 0.334        |
| Contrast enhancement perilesional         | 0.047        |
| Vascularization                           | -0.035       |
|                                           | ICC          |
| Edema diameter (in mm)                    | 0.846        |
| Max diameter (in mm wo/ tail)             | 0.833        |

**Table S6 Prognostic performance of developed models depicted as concordance index with 95% confidence interval (in parenthesis).**

| Model                      | Radiomics-T1T2+Semantic - | 0.65 (0.64-0.66) | 0.62 (0.6-0.63)  | 0.64 (0.63-0.65) |
|----------------------------|---------------------------|------------------|------------------|------------------|
|                            | Semantic -                | 0.67 (0.65-0.68) | 0.64 (0.63-0.65) | 0.55 (0.53-0.56) |
|                            | Radiomics-T1T2 -          | 0.63 (0.62-0.64) | 0.62 (0.61-0.63) | 0.65 (0.63-0.66) |
|                            | Radiomics-T2 -            | 0.6 (0.59-0.62)  | 0.59 (0.57-0.6)  | 0.54 (0.53-0.56) |
|                            | Radiomics-T1 -            | 0.68 (0.67-0.7)  | 0.69 (0.68-0.71) | 0.64 (0.63-0.66) |
|                            |                           | ENR              | LASSO            | RSF              |
| Machine learning algorithm |                           |                  |                  |                  |

C-index



0.65  
0.60  
0.55

**Abbreviations:** ENR: elastic net regression. LASSO: least absolute shrinkage and selection operator. RSF: random survival forest.

**Table S7 Final input variables and model coefficients of the final elastic net regression models**

Displayed beta coefficients are based on the standardized features.

| <b>Feature</b>                                           | <b>B coefficient</b> |
|----------------------------------------------------------|----------------------|
| <b>Radiomics-T1</b>                                      |                      |
| original_firstorder_Mean                                 | -0.4066929           |
| original_shape_SurfaceArea                               | 0.2425698            |
| original_gldm_SmallDependenceHighGrayLevelEmphasis       | 0                    |
| original_gldm_LargeDependenceLowGrayLevelEmphasis        | 0                    |
| original_gldm_LowGrayLevelEmphasis                       | 0                    |
| original_shape_Maximum2DDiameterSlice                    | 0                    |
| original_shape_Elongation                                | 0                    |
| original_shape_Flatness                                  | 0                    |
| original_glszm_HighGrayLevelZoneEmphasis                 | 0                    |
| original_gldm_HighGrayLevelEmphasis                      | 0                    |
| original_glszm_GrayLevelVariance                         | 0                    |
| original_gldm_SmallDependenceLowGrayLevelEmphasis        | 0                    |
| original_gldm_GrayLevelNonUniformity                     | 0                    |
| <b>Radiomics-T2</b>                                      |                      |
| original_glszm_SizeZoneNonUniformity                     | 0.140311012          |
| original_gldm_LargeDependenceLowGrayLevelEmphasis        | 0.113575289          |
| original_glszm_LargeAreaLowGrayLevelEmphasis             | 0.100207348          |
| original_gldm_GrayLevelNonUniformity                     | 0.092784326          |
| original_glszm_SmallAreaEmphasis                         | -0.07906781          |
| original_gldm_SmallDependenceHighGrayLevelEmphasis       | -0.03391476          |
| original_shape_Flatness                                  | -0.03074633          |
| original_gldm_SmallDependenceEmphasis                    | -0.01761524          |
| original_glszm_ZonePercentage                            | -0.0077572           |
| original_ngtdm_Busyness                                  | 0                    |
| <b>Radiomics-T1T2</b>                                    |                      |
| original_glszm_SizeZoneNonUniformity_T2FS                | 0.34867721           |
| original_gldm_LargeDependenceLowGrayLevelEmphasis_T2FS   | 0.31184005           |
| original_gldm_MCC_T2FS                                   | 0.22502526           |
| original_gldm_LowGrayLevelEmphasis_T1FSGd                | 0.21135891           |
| original_shape_Flatness_T1FSGd                           | -0.06965916          |
| original_firstorder_Kurtosis_T1FSGd                      | -0.04694111          |
| original_gldm_LargeDependenceLowGrayLevelEmphasis_T1FSGd | 0                    |
| original_shape_Flatness_T2FS                             | 0                    |
| original_shape_Elongation_T1FSGd                         | 0                    |
| original_ngtdm_Busyness_T2FS                             | 0                    |
| original_gldm_SmallDependenceLowGrayLevelEmphasis_T1FSGd | 0                    |
| <b>Semantic</b>                                          |                      |

|                                                          |             |
|----------------------------------------------------------|-------------|
| Localization 1: epifascial                               | -0.82732997 |
| Necrosis                                                 | 0.462067102 |
| Contrast enhancement perilesional                        | 0.445673686 |
| Localization 4: intramuscular                            | 0.305219026 |
| Tail sign                                                | 0.206750047 |
| Anatomical region 3: leg                                 | -0.19335878 |
| Tumor contrast enhancement (<1/3;1/3-2/3;>2/3)           | -0.15002045 |
| Max diameter (in mm wo/ tail)                            | 0.002050004 |
| Edema diameter (in mm)                                   | 0.000549519 |
| <b>Radiomics-T1T1+Semantic</b>                           |             |
| Localization_T1FSGd                                      | -0.4307884  |
| Contrast enhancement perilesional                        | 0.295373492 |
| Necrosis                                                 | 0.205045814 |
| Localization 4: intramuscular                            | 0.186908909 |
| original_gldm_LargeDependenceLowGrayLevelEmphasis_T2FS   | 0.15237439  |
| Tail sign                                                | 0.150061231 |
| original_gldm_MCC_T2FS                                   | 0.125961179 |
| original_gldm_LowGrayLevelEmphasis_T1FSGd                | 0.113698266 |
| original_glszm_SizeZoneNonUniformity_T2FS                | 0.100942757 |
| Anatomical region 3: leg                                 | -0.0849289  |
| original_firstorder_Kurtosis_T1FSGd                      | -0.05369461 |
| Tumor contrast enhancement                               | -0.05337103 |
| original_shape_Flatness_T1FSGd                           | -0.02081777 |
| original_shape_Flatness_T2FS                             | -0.01964066 |
| original_ngtdm_Busyness_T2FS                             | 0.010474745 |
| original_shape_Elongation_T1FSGd                         | -0.00413689 |
| original_gldm_LargeDependenceLowGrayLevelEmphasis_T1FSGd | 0.003302509 |
| Edema diameter (in mm)                                   | 0.000346507 |
| Max diameter (in mm wo/ tail)                            | 0.000326452 |
| original_gldm_SmallDependenceLowGrayLevelEmphasis_T1FSGd | 0           |

**Table S8 Brier scores of developed models**

| <b>Model</b>            | <b>Brier score</b> |
|-------------------------|--------------------|
| Radiomics-T1            | 88                 |
| Radiomics-T2            | 71                 |
| Radiomics-T1T2          | 115                |
| Semantic                | 702                |
| Radiomics-T1T2+Semantic | 371                |
| Volume                  | 3646               |
| AJCC                    | 30                 |
| Age                     | 24                 |
| Radiomics-T1+AJCC+Age   | 53                 |
| Radiomics-T2+AJCC+Age   | 41                 |
| Radiomics-T1T2+AJCC+Age | 37                 |
| Semantic+AJCC+Age       | 56                 |



**Table S9 Performance of radiomic and semantic models in randomly chosen non-independent cohorts**

| Model                     | Patient cohort   |                                  |
|---------------------------|------------------|----------------------------------|
|                           | Training         | Testing                          |
|                           | Radiomics-T1 -   | 0.63 (0.62-0.64)0.63 (0.49-0.76) |
|                           | Radiomics-T2 -   | 0.63 (0.62-0.64)0.63 (0.49-0.76) |
|                           | Radiomics-T1T2 - | 0.56 (0.55-0.58)0.65 (0.51-0.77) |
| Semantic -                | 0.64 (0.63-0.66) | 0.63 (0.49-0.78)                 |
| Radiomics-T1T2+Semantic - | 0.61 (0.6-0.63)  | 0.64 (0.51-0.78)                 |

C-index

0.64

0.62

0.60

0.58

**Table S10 TRIPOD Checklist: Prediction Model Development and Validation**

| Section/Topic                |     | Checklist Item |                                                                                                                                                                                                       | Page         |
|------------------------------|-----|----------------|-------------------------------------------------------------------------------------------------------------------------------------------------------------------------------------------------------|--------------|
| Title and abstract           |     |                |                                                                                                                                                                                                       |              |
| Title                        | 1   | 0;V            | Identify the study as developing and/or validating a multivariable prediction model, the target population, and the outcome to be predicted.                                                          | 1            |
| Abstract                     | 2   | 0;V            | Provide a summary of objectives, study design, setting, participants, sample size, predictors, outcome, statistical analysis, results, and conclusions.                                               | 1            |
| Introduction                 |     |                |                                                                                                                                                                                                       |              |
| Background and objectives    | 3a  | 0;V            | Explain the medical context (including whether diagnostic or prognostic) and rationale for developing or validating the multivariable prediction model, including references to existing models.      | 3            |
|                              | 3b  | 0;V            | Specify the objectives, including whether the study describes the development or validation of the model or both.                                                                                     | 3            |
| Methods                      |     |                |                                                                                                                                                                                                       |              |
| Source of data               | 4a  | 0;V            | Describe the study design or source of data (e.g., randomized trial, cohort, or registry data), separately for the development and validation data sets, if applicable.                               | 3            |
|                              | 4b  | 0;V            | Specify the key study dates, including start of accrual; end of accrual; and, if applicable, end of follow-up.                                                                                        | 7            |
| Participants                 | 5a  | 0;V            | Specify key elements of the study setting (e.g., primary care, secondary care, general population) including number and location of centres.                                                          | 3            |
|                              | 5b  | 0;V            | Describe eligibility criteria for participants.                                                                                                                                                       | 3            |
|                              | 5c  | 0;V            | Give details of treatments received, if relevant.                                                                                                                                                     | 7            |
| Outcome                      | 6a  | 0;V            | Clearly define the outcome that is predicted by the prediction model, including how and when assessed.                                                                                                | 3,5          |
|                              | 6b  | 0;V            | Report any actions to blind assessment of the outcome to be predicted.                                                                                                                                | 4            |
| Predictors                   | 7a  | 0;V            | Clearly define all predictors used in developing or validating the multivariable prediction model, including how and when they were measured.                                                         | 6            |
|                              | 7b  | 0;V            | Report any actions to blind assessment of predictors for the outcome and other predictors.                                                                                                            | 4            |
| Sample size                  | 8   | 0;V            | Explain how the study size was arrived at.                                                                                                                                                            | 3, Fig S1    |
| Missing data                 | 9   | 0;V            | Describe how missing data were handled (e.g., complete-case analysis, single imputation, multiple imputation) with details of any imputation method.                                                  | 3            |
| Statistical analysis methods | 10a | D              | Describe how predictors were handled in the analyses.                                                                                                                                                 | 4-5          |
|                              | 10b | D              | Specify type of model, all model-building procedures (including any predictor selection), and method for internal validation.                                                                         | 5-6          |
|                              | 10c | V              | For validation, describe how the predictions were calculated.                                                                                                                                         | 6            |
|                              | 10d | 0;V            | Specify all measures used to assess model performance and, if relevant, to compare multiple models.                                                                                                   | 6,7          |
|                              | 10e | V              | Describe any model updating (e.g., recalibration) arising from the validation, if done.                                                                                                               | -            |
| Risk groups                  | 11  | 0;V            | Provide details on how risk groups were created, if done.                                                                                                                                             | 7            |
| Development vs. validation   | 12  | V              | For validation, identify any differences from the development data in setting, eligibility criteria, outcome, and predictors.                                                                         | 6            |
| Results                      |     |                |                                                                                                                                                                                                       |              |
| Participants                 | 13a | 0;V            | Describe the flow of participants through the study, including the number of participants with and without the outcome and, if applicable, a summary of the follow-up time. A diagram may be helpful. | Fig S1       |
|                              | 13b | 0;V            | Describe the characteristics of the participants (basic demographics, clinical features, available predictors), including the number of participants with missing data for predictors and outcome.    | Table 2, p 7 |
|                              | 13c | V              | For validation, show a comparison with the development data of the distribution of important variables (demographics, predictors and outcome).                                                        | Table 2, p 7 |
| Model development            | 14a | D              | Specify the number of participants and outcome events in each analysis.                                                                                                                               | Table 2, p 7 |
|                              | 14b | D              | If done, report the unadjusted association between each candidate predictor and outcome.                                                                                                              | 9, 12        |
| Model specification          | 15a | D              | Present the full prediction model to allow predictions for individuals (i.e., all regression coefficients, and model intercept or baseline survival at a given time point).                           | T S7 coeff.  |
|                              | 15b | D              | Explain how to use the prediction model.                                                                                                                                                              | -            |
| Model performance            | 16  | 0;V            | Report performance measures (with CIs) for the prediction model.                                                                                                                                      | 9,11         |
| Model-updating               | 17  | V              | If done, report the results from any model updating (i.e., model specification, model performance).                                                                                                   | -            |
| Discussion                   |     |                |                                                                                                                                                                                                       |              |
| Limitations                  | 18  | 0;V            | Discuss any limitations of the study (such as nonrepresentative sample, few events per predictor, missing data).                                                                                      | 14           |
| Interpretation               | 19a | V              | For validation, discuss the results with reference to performance in the development data, and any other validation data.                                                                             | 12,13        |
|                              | 19b | 0;V            | Give an overall interpretation of the results, considering objectives, limitations, results from similar studies, and other relevant evidence.                                                        | 12           |
| Implications                 | 20  | 0;V            | Discuss the potential clinical use of the model and implications for future research.                                                                                                                 | 14           |
| Other information            |     |                |                                                                                                                                                                                                       |              |
| Supplementary information    | 21  | 0;V            | Provide information about the availability of supplementary resources, such as study protocol, Web calculator, and data sets.                                                                         | 14           |
| Funding                      | 22  | 0;V            | Give the source of funding and the role of the funders for the present study.                                                                                                                         | 14           |

## References

- [1] Zwanenburg A. Vallières M. Abdalah MA. Aerts HJWL. Andrearczyk V. Apte A. et al. The Image Biomarker Standardization Initiative: Standardized Quantitative Radiomics for High-Throughput Image-based Phenotyping. *Radiology* 2020;191145. doi:10.1148/radiol.2020191145.
